# Supplementary material for: Nitrogen restricts future sub-arctic treeline advance in an individual-based dynamic vegetation model
Source: Copernicus journal article supplement (doi:10.5194/bg-18-6329-2021), 2021-12-13
Supplement: Supplementary file 2 [file bg-18-6329-2021-supplement.zip]

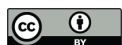

*Supplement of*

## **Nitrogen restricts future sub-arctic treeline advance in an individual-based dynamic vegetation model**

**Adrian Gustafson et al.**

*Correspondence to:* Adrian Gustafson ([adrian.gustafson@nateko.lu.se](mailto:adrian.gustafson@nateko.lu.se))

- [bg-18-6329-2021-supplement-title-page.pdf](#)
- [S1 Additional figures.pdf](#)
- [S2 Additional tables.pdf](#)

The copyright of individual parts of the supplement might differ from the article licence.
