# Supplementary material for: Nitrogen restricts future sub-arctic treeline advance in an individual-based dynamic vegetation model
Source: Copernicus journal article supplement (doi:10.5194/bg-18-6329-2021), 2021-12-13
Supplement: Supplementary file 3 [file bg-18-6329-2021-supplement.zip]

Archive with 3 entries (3 files):
- S2 Additional tables.pdf
- S1 Additional figures.pdf
- bg-18-6329-2021-supplement-title-page.pdf
